# Supplementary material for: A novel biosensor-based microarray assay for the visualized detection of CYP2C19 ∗2, ∗3, ∗4 and ∗5 polymorphisms
Source: publisher site journal article supplement (doi:10.1515/cclm-2014-0700), 2014-10-02
Supplement: Supplementary file 1 [file Supplementary Material.doc]

**Supplementary Material**

**Table 4.** **Concordance of BBM assay with given plasmids for *CYP2C19*3***

| **BBM assay** | **Plasmids with given genotype** | | | **Total** |
| --- | --- | --- | --- | --- |
|  | ****1/*1*** | ****1/*3*** | ****3/*3*** |  |
| ****1/*1*** | 10 | 0 | 0 | 10 |
| ****1/*3*** | 0 | 10 | 0 | 10 |
| ****3/*3*** | 0 | 0 | 10 | 10 |
| **Total** | 10 | 10 | 10 | 30 |

Kappa = 1.000, BBM: Biosensor-based microarray.

**Table 5.** **Concordance of BBM assay with given plasmids for *CYP2C19*4***

| **BBM assay** | **Plasmids with given genotype** | | | **Total** |
| --- | --- | --- | --- | --- |
|  | ****1/*1*** | ****1/*4*** | ****4/*4*** |  |
| ****1/*1*** | 10 | 0 | 0 | 10 |
| ****1/*4*** | 0 | 10 | 0 | 10 |
| ****4/*4*** | 0 | 0 | 10 | 10 |
| **Total** | 10 | 10 | 10 | 30 |

Kappa = 1.000, BBM: Biosensor-based microarray.

**Table 6.** **Concordance of BBM assay with given plasmids for *CYP2C19*5***

| **BBM assay** | **Plasmids with given genotype** | | | **Total** |
| --- | --- | --- | --- | --- |
|  | ****1/*1*** | ****1/*5*** | ****5/*5*** |  |
| ****1/*1*** | 10 | 0 | 0 | 10 |
| ****1/*5*** | 0 | 10 | 0 | 10 |
| ****5/*5*** | 0 | 0 | 10 | 10 |
| **Total** | 10 | 10 | 10 | 30 |

Kappa = 1.000, BBM: Biosensor-based microarray.

**Figure 3. The result of a small scale clinic survey for extensive (EM), poor (PM), and intermediate (IM) metabolizers of clopidogrel.** *1/*1 accounted for 43.2%, *1/*2 and *1/*3 accounted for 40.9%, *2/*2 accounted for 15.9%, respectively.
