# Supplementary material for: A novel biosensor-based microarray assay for the visualized detection of CYP2C19 ∗2, ∗3, ∗4 and ∗5 polymorphisms
Source: publisher site journal article supplement (doi:10.1515/cclm-2014-0700), 2014-10-02
Supplement: Supplementary file 2 [file cclm2014.700_Supplementary_Material.doc]

**Supplementary Material**

**Supplementary Table 1** Concordance of BBM assay with given plasmids for *CYP2C19*3.*

| **BBM assay** | **Plasmids with given genotype** | | | **Total** |
| --- | --- | --- | --- | --- |
|  | ****1/*1*** | ****1/*3*** | ****3/*3*** |  |
| ****1/*1*** | 10 | 0 | 0 | 10 |
| ****1/*3*** | 0 | 10 | 0 | 10 |
| ****3/*3*** | 0 | 0 | 10 | 10 |
| **Total** | 10 | 10 | 10 | 30 |

Kappa = 1.000. BBM, biosensor-based microarray.

**Supplementary Table 2** Concordance of BBM assay with given plasmids for *CYP2C19*4.*

| **BBM assay** | **Plasmids with given genotype** | | | **Total** |
| --- | --- | --- | --- | --- |
|  | ****1/*1*** | ****1/*4*** | ****4/*4*** |  |
| ****1/*1*** | 10 | 0 | 0 | 10 |
| ****1/*4*** | 0 | 10 | 0 | 10 |
| ****4/*4*** | 0 | 0 | 10 | 10 |
| **Total** | 10 | 10 | 10 | 30 |

Kappa = 1.000. BBM, biosensor-based microarray.

**Supplementary** Table 3 Concordance of BBM assay with given plasmids for *CYP2C19*5.*

| **BBM assay** | **Plasmids with given genotype** | | | **Total** |
| --- | --- | --- | --- | --- |
|  | ****1/*1*** | ****1/*5*** | ****5/*5*** |  |
| ****1/*1*** | 10 | 0 | 0 | 10 |
| ****1/*5*** | 0 | 10 | 0 | 10 |
| ****5/*5*** | 0 | 0 | 10 | 10 |
| **Total** | 10 | 10 | 10 | 30 |

Kappa = 1.000. BBM, biosensor-based microarray.

**Supplementary Figure 1** The result of a small scale clinic survey for extensive (EM), poor (PM), and intermediate (IM) metabolizers of clopidogrel.

**1/*1* accounted for 43.2%, **1/*2* and **1/*3* accounted for 40.9%, **2/*2* accounted for 15.9%, respectively.
